# Supplementary material
Source: PubMed Central journal article supplement (PMC10205477)
Supplement: NIHMS1882090-supplement-011585_-_Supplemental_Material.pdf [file NIHMS1882090-supplement-011585_-_Supplemental_Material.pdf]

# SUPPLEMENTAL MATERIAL

## Table of Contents

| <b>Supplemental Tables</b>                                                                                  | <b>Page</b> |
|-------------------------------------------------------------------------------------------------------------|-------------|
| Supplemental Table I. Patient Characteristics Before and After Weighting in the Overall Cohort in OptumLabs | 2           |
| Supplemental Table II. Patient Characteristics Before and After Weighting in the Overall Cohort in the UKB  | 8           |
| Supplemental Table III. Primary Composite Outcome (Crude Numbers)                                           | 10          |
| Supplemental Table IV. Safety Outcomes (Crude Numbers)                                                      | 12          |
| Supplemental Table V. Sensitivity Analysis Replicating EAST-AFNET 4                                         | 15          |
| Supplemental Table VI. Falsification Analysis                                                               | 17          |

**Supplemental Tables**

**Supplemental Table I. Patient Characteristics Before and After Weighting in the Overall Cohort in OptumLabs**

|                      | Before PS Weighting                |                                 |                         | After PS Weighting                 |                                 |                         |
|----------------------|------------------------------------|---------------------------------|-------------------------|------------------------------------|---------------------------------|-------------------------|
|                      | No Early Rhythm Control (N=77,460) | Early Rhythm Control (N=24,382) | Standardized Difference | No Early Rhythm Control (N=77,460) | Early Rhythm Control (N=24,382) | Standardized Difference |
| <b>Age</b>           |                                    |                                 |                         |                                    |                                 |                         |
| Mean (SD)            | 73.0 (10.4)                        | 70.7 (10.2)                     | 0.228                   | 71.2 (10.9)                        | 71.2 (10.9)                     | 0.000                   |
| <b>Age group</b>     |                                    |                                 |                         |                                    |                                 |                         |
| 18-64 years          | 19.8%                              | 26.6%                           | 0.163                   | 24.6%                              | 24.6%                           | 0.000                   |
| 65-74 years          | 28.9%                              | 33.9%                           | 0.108                   | 28.2%                              | 28.2%                           | 0.000                   |
| 75+ years            | 51.3%                              | 39.5%                           | 0.240                   | 47.2%                              | 47.2%                           | 0.000                   |
| <b>Female</b>        | 52.4%                              | 43.9%                           | 0.170                   | 41.7%                              | 41.7%                           | 0.000                   |
| <b>Race</b>          |                                    |                                 |                         |                                    |                                 |                         |
| Asian                | 2.5%                               | 2.1%                            | 0.029                   | 2.9%                               | 2.9%                            | 0.000                   |
| Black                | 12.0%                              | 9.2%                            | 0.089                   | 10.7%                              | 10.7%                           | 0.000                   |
| Hispanic             | 6.6%                               | 5.5%                            | 0.046                   | 7.1%                               | 7.1%                            | 0.000                   |
| Unknown              | 2.4%                               | 2.4%                            | 0.000                   | 2.1%                               | 2.1%                            | 0.000                   |
| White                | 76.4%                              | 80.7%                           | 0.105                   | 77.3%                              | 77.3%                           | 0.000                   |
| <b>Region</b>        |                                    |                                 |                         |                                    |                                 |                         |
| Midwest              | 29.3%                              | 32.0%                           | 0.060                   | 28.8%                              | 28.8%                           | 0.000                   |
| Northeast            | 22.0%                              | 12.6%                           | 0.250                   | 18.7%                              | 18.7%                           | 0.000                   |
| South                | 39.4%                              | 44.5%                           | 0.103                   | 42.1%                              | 42.1%                           | 0.000                   |
| Unknown              | 0.1%                               | 0.1%                            | 0.007                   | 0.0%                               | 0.0%                            | 0.000                   |
| West                 | 9.3%                               | 10.8%                           | 0.050                   | 10.4%                              | 10.4%                           | 0.000                   |
| <b>Comorbidities</b> |                                    |                                 |                         |                                    |                                 |                         |
| Systolic HF          | 18.0%                              | 24.9%                           | 0.168                   | 27.5%                              | 27.5%                           | 0.000                   |

|                                      |       |       |       |       |       |       |
|--------------------------------------|-------|-------|-------|-------|-------|-------|
| <b>Cardiomyopathy</b>                |       |       |       |       |       |       |
| None                                 | 79.6% | 73.2% | 0.152 | 67.6% | 67.6% | 0.000 |
| Hypertrophic                         | 1.3%  | 1.7%  | 0.036 | 2.9%  | 2.9%  | 0.000 |
| Ischemic                             | 4.9%  | 6.6%  | 0.072 | 8.7%  | 8.7%  | 0.000 |
| Dilated                              | 14.2% | 18.5% | 0.117 | 20.9% | 20.9% | 0.000 |
| <b>Implanted device</b>              |       |       |       |       |       |       |
| None                                 | 86.4% | 84.0% | 0.068 | 73.6% | 73.6% | 0.000 |
| CRT defibrillator                    | 0.6%  | 1.0%  | 0.043 | 2.0%  | 2.0%  | 0.000 |
| ICD                                  | 5.4%  | 6.1%  | 0.030 | 12.9% | 12.9% | 0.000 |
| CRT pacemaker                        | 0.1%  | 0.1%  | 0.004 | 0.3%  | 0.3%  | 0.000 |
| Dual chamber pacemaker               | 5.5%  | 6.4%  | 0.035 | 8.0%  | 8.0%  | 0.000 |
| Single chamber pacemaker             | 1.9%  | 2.4%  | 0.035 | 3.2%  | 3.2%  | 0.000 |
| <b>Indication for defibrillator</b>  |       |       |       |       |       |       |
| No defibrillator                     | 94.0% | 92.9% | 0.043 | 85.1% | 85.1% | 0.000 |
| Primary                              | 3.9%  | 3.9%  | 0.001 | 7.2%  | 7.2%  | 0.000 |
| Secondary                            | 2.1%  | 3.2%  | 0.065 | 7.1%  | 7.1%  | 0.000 |
| Other supraventricular arrhythmia    | 11.0% | 13.6% | 0.079 | 22.4% | 22.4% | 0.000 |
| Atrial flutter                       | 9.9%  | 26.1% | 0.433 | 25.9% | 25.9% | 0.000 |
| Ventricular arrhythmia               | 12.6% | 17.4% | 0.136 | 25.6% | 25.6% | 0.000 |
| Prior ablation for other arrhythmias | 1.6%  | 10.7% | 0.388 | 27.9% | 27.9% | 0.000 |
| Cardioversion                        | 5.5%  | 31.3% | 0.706 | 12.9% | 12.9% | 0.000 |
| Surgical ablation/Maze procedure     | 0.0%  | 0.4%  | 0.084 | 0.4%  | 0.4%  | 0.000 |
| Hypertension                         | 96.9% | 95.8% | 0.063 | 96.6% | 96.6% | 0.000 |
| Diabetes mellitus                    | 45.5% | 40.8% | 0.096 | 47.7% | 47.7% | 0.000 |
| Thromboembolism                      | 27.9% | 23.0% | 0.114 | 27.4% | 27.4% | 0.000 |
| Stroke                               | 22.4% | 17.4% | 0.126 | 21.8% | 21.8% | 0.000 |
| Ischemic stroke                      | 19.7% | 14.8% | 0.129 | 19.5% | 19.5% | 0.000 |
| TIA                                  | 14.9% | 12.6% | 0.067 | 14.2% | 14.2% | 0.000 |
| CAD                                  | 65.9% | 72.1% | 0.134 | 80.1% | 80.1% | 0.000 |
| PAD                                  | 21.5% | 16.7% | 0.122 | 21.8% | 21.8% | 0.000 |
| Vascular disease (CAD or PAD)        | 69.9% | 74.4% | 0.102 | 81.8% | 81.8% | 0.000 |

|                                  |       |       |       |       |       |       |
|----------------------------------|-------|-------|-------|-------|-------|-------|
| Myocardial infarction            | 26.3% | 28.9% | 0.058 | 36.4% | 36.4% | 0.000 |
| CABG                             | 15.1% | 24.8% | 0.244 | 35.9% | 35.9% | 0.000 |
| PCI                              | 17.5% | 19.1% | 0.042 | 26.4% | 26.4% | 0.000 |
| Left ventricular hypertrophy     | 34.9% | 43.1% | 0.169 | 43.3% | 43.3% | 0.000 |
| Prior valve procedure            | 3.1%  | 10.2% | 0.290 | 6.4%  | 6.4%  | 0.000 |
| Mitral stenosis                  | 2.7%  | 3.9%  | 0.069 | 4.7%  | 4.7%  | 0.000 |
| Mitral regurgitation             | 41.3% | 52.7% | 0.229 | 50.3% | 50.3% | 0.000 |
| Major bleeding                   | 32.5% | 31.9% | 0.013 | 33.1% | 33.1% | 0.000 |
| Intracranial bleeding            | 3.8%  | 3.2%  | 0.035 | 3.4%  | 3.4%  | 0.000 |
| Stage 3-5 CKD                    | 21.2% | 19.1% | 0.053 | 22.1% | 22.1% | 0.000 |
| Renal failure requiring dialysis | 2.0%  | 1.7%  | 0.023 | 1.7%  | 1.7%  | 0.000 |
| Liver disease                    | 18.1% | 18.1% | 0.002 | 18.6% | 18.6% | 0.000 |
| Non skin cancer                  | 23.0% | 21.6% | 0.035 | 21.5% | 21.5% | 0.000 |
| Fall                             | 25.3% | 19.8% | 0.131 | 23.4% | 23.4% | 0.000 |
| Anemia                           | 60.8% | 60.4% | 0.009 | 64.2% | 64.2% | 0.000 |
| Alcoholism                       | 6.6%  | 6.4%  | 0.008 | 5.6%  | 5.6%  | 0.000 |
| Smoking                          | 38.4% | 42.9% | 0.092 | 43.2% | 43.2% | 0.000 |
| Hypothyroidism                   | 34.8% | 33.7% | 0.024 | 36.8% | 36.8% | 0.000 |
| Thyrotoxicosis                   | 5.9%  | 5.3%  | 0.023 | 6.6%  | 6.6%  | 0.000 |
| Esophageal disease               | 57.0% | 55.5% | 0.030 | 58.1% | 58.1% | 0.000 |
| Obesity                          | 33.3% | 37.9% | 0.096 | 36.0% | 36.0% | 0.000 |
| COPD                             | 25.8% | 24.9% | 0.022 | 27.1% | 27.1% | 0.000 |
| Obstructive sleep apnea          | 21.5% | 28.2% | 0.154 | 27.6% | 27.6% | 0.000 |
| Hyperlipidemia                   | 90.0% | 90.3% | 0.009 | 92.6% | 92.6% | 0.000 |
| Osteoporosis                     | 23.2% | 19.0% | 0.105 | 19.3% | 19.3% | 0.000 |
| Pneumonia                        | 29.2% | 28.9% | 0.007 | 32.6% | 32.6% | 0.000 |
| Fracture                         | 25.1% | 22.1% | 0.070 | 25.0% | 25.0% | 0.000 |
| Dementia                         | 14.9% | 7.7%  | 0.232 | 12.7% | 12.7% | 0.000 |
| <b>Previous Drug Treatment</b>   |       |       |       |       |       |       |
| N of previous AADs               |       |       |       |       |       |       |
| 0                                | 99.2% | 1.5%  | 9.015 | 28.0% | 28.0% | 0.000 |

|                                                   |       |       |       |       |       |       |
|---------------------------------------------------|-------|-------|-------|-------|-------|-------|
| 1                                                 | 0.8%  | 89.3% | 3.887 | 70.3% | 70.3% | 0.000 |
| 2+                                                | 0.0%  | 9.2%  | 0.448 | 1.8%  | 1.8%  | 0.000 |
| Amiodarone use                                    | 0.6%  | 62.8% | 1.797 | 50.7% | 50.7% | 0.000 |
| <b>N of previous rate control drugs</b>           |       |       |       |       |       |       |
| 0                                                 | *     | *     | 0.434 | 0.1%  | 0.1%  | 0.000 |
| 1                                                 | 60.0% | 47.5% | 0.252 | 46.6% | 46.6% | 0.000 |
| 2                                                 | 29.1% | 30.2% | 0.023 | 33.9% | 33.9% | 0.000 |
| 3+                                                | *     | *     | 0.087 | 19.4% | 19.4% | 0.000 |
| <b>Concurrent Medication</b>                      |       |       |       |       |       |       |
| <b>Oral anticoagulants</b>                        |       |       |       |       |       |       |
| none                                              | 69.6% | 54.8% | 0.310 | 71.1% | 71.1% | 0.000 |
| Warfarin                                          | 15.5% | 17.0% | 0.039 | 13.2% | 13.2% | 0.000 |
| NOAC                                              | 14.8% | 28.3% | 0.331 | 15.7% | 15.7% | 0.000 |
| ACE inhibitors                                    | 29.3% | 28.5% | 0.019 | 29.8% | 29.8% | 0.000 |
| ARB                                               | 18.2% | 18.3% | 0.005 | 18.8% | 18.8% | 0.000 |
| Thiazides                                         | 18.1% | 15.7% | 0.065 | 14.2% | 14.2% | 0.000 |
| Beta blockers (rate control)                      | 71.4% | 55.2% | 0.340 | 69.5% | 69.5% | 0.000 |
| Other beta blockers (not rate control)            | 5.1%  | 4.2%  | 0.042 | 4.0%  | 4.0%  | 0.000 |
| Calcium channel blockers (rate control)           | 14.4% | 10.3% | 0.124 | 10.7% | 10.7% | 0.000 |
| Other calcium channel blockers (not rate control) | 18.8% | 16.1% | 0.070 | 15.9% | 15.9% | 0.000 |
| Digitalis                                         | 6.7%  | 4.6%  | 0.090 | 7.1%  | 7.1%  | 0.000 |
| Diuretics--aldosterone antagonist                 | 5.3%  | 6.0%  | 0.032 | 6.3%  | 6.3%  | 0.000 |
| Loop diuretics                                    | 24.8% | 26.6% | 0.041 | 29.1% | 29.1% | 0.000 |
| Other antihypertensive drugs                      | 9.4%  | 8.2%  | 0.044 | 8.3%  | 8.3%  | 0.000 |
| Statin                                            | 50.7% | 51.7% | 0.019 | 55.3% | 55.3% | 0.000 |
| Insulin                                           | 9.4%  | 6.9%  | 0.093 | 10.6% | 10.6% | 0.000 |
| Metformin                                         | 13.0% | 12.3% | 0.020 | 12.4% | 12.4% | 0.000 |
| Other antidiabetic drugs                          | 11.7% | 10.0% | 0.052 | 10.4% | 10.4% | 0.000 |
| Antiplatelet                                      | 13.1% | 10.3% | 0.088 | 14.5% | 14.5% | 0.000 |
| NSAIDs                                            | 9.0%  | 7.9%  | 0.040 | 9.2%  | 9.2%  | 0.000 |

|                                                 |            |            |       |            |            |       |
|-------------------------------------------------|------------|------------|-------|------------|------------|-------|
| Antiulcer agents                                | 28.5%      | 26.7%      | 0.042 | 28.0%      | 28.0%      | 0.000 |
| Antidepressant                                  | 24.5%      | 19.3%      | 0.126 | 24.3%      | 24.3%      | 0.000 |
| <b>CHA<sub>2</sub>DS<sub>2</sub>-VASc</b>       |            |            |       |            |            |       |
| Mean (SD)                                       | 5.0 (1.8)  | 4.7 (1.8)  | 0.183 | 5.0 (1.8)  | 5.0 (1.8)  | 0.000 |
| <b>CHA<sub>2</sub>DS<sub>2</sub>-VASc group</b> |            |            |       |            |            |       |
| 2-3                                             | 22.9%      | 29.3%      | 0.146 | 22.6%      | 22.6%      | 0.000 |
| 4+                                              | 77.1%      | 70.7%      | 0.146 | 77.4%      | 77.4%      | 0.000 |
| <b>Baseline period duration, years</b>          |            |            |       |            |            |       |
| Mean (SD)                                       | 4.9 (2.7)  | 5.2 (3.0)  | 0.096 | 5.1 (2.9)  | 5.1 (2.9)  | 0.000 |
| <b>Index year</b>                               |            |            |       |            |            |       |
| 2012                                            | 6.2%       | 6.7%       | 0.021 | 7.0%       | 7.0%       | 0.000 |
| 2013                                            | 17.4%      | 17.9%      | 0.013 | 14.9%      | 14.9%      | 0.000 |
| 2014                                            | 17.0%      | 15.6%      | 0.038 | 17.5%      | 17.5%      | 0.000 |
| 2015                                            | 16.4%      | 16.2%      | 0.005 | 17.4%      | 17.4%      | 0.000 |
| 2016                                            | 20.3%      | 20.3%      | 0.000 | 20.8%      | 20.8%      | 0.000 |
| 2017                                            | 22.7%      | 23.3%      | 0.014 | 22.3%      | 22.3%      | 0.000 |
| <b>Health Utilization within past 12 months</b> |            |            |       |            |            |       |
| Number of emergency room visits                 |            |            |       |            |            |       |
| Mean (SD)                                       | 0.8 (1.5)  | 0.8 (1.4)  | 0.030 | 0.9 (1.8)  | 0.9 (1.8)  | 0.000 |
| Number of inpatient stays                       |            |            |       |            |            |       |
| Mean (SD)                                       | 0.9 (1.2)  | 1.3 (1.3)  | 0.325 | 1.0 (1.5)  | 1.0 (1.5)  | 0.000 |
| Number of days in hospital                      |            |            |       |            |            |       |
| Mean (SD)                                       | 6.2 (12.3) | 9.3 (13.7) | 0.239 | 6.9 (15.0) | 6.9 (15.0) | 0.000 |
| Number of HF hospitalizations                   |            |            |       |            |            |       |
| Mean (SD)                                       | 0.1 (0.5)  | 0.2 (0.6)  | 0.139 | 0.2 (0.6)  | 0.2 (0.6)  | 0.000 |

Values are presented as mean (SD) or as absolute numbers (%). AAD indicates antiarrhythmic drug; ACE, angiotensin-converting enzyme; ARB, angiotensin II receptor blockers; CAD; coronary artery disease; CKD, chronic kidney disease; COPD, chronic obstructive pulmonary disease; CRT,

cardiac resynchronization therapy; ICD, implantable cardioverter-defibrillators; HF, heart failure; NOAC, non-vitamin K antagonist oral anticoagulant; PS, propensity score. \* To maintain de-identification, OptumLabs does not allow researchers to disclose the number of events when the number is 10 or fewer.

**Supplemental Table II. Patient Characteristics Before and After Weighting in the Overall Cohort in the UK Biobank**

|                                        | Before PS Weighting                   |                                   |                         | After PS Weighting                    |                                   |                         |
|----------------------------------------|---------------------------------------|-----------------------------------|-------------------------|---------------------------------------|-----------------------------------|-------------------------|
|                                        | No Early Rhythm Control<br>(N=10,398) | Early Rhythm Control<br>(N=1,227) | Standardized Difference | No Early Rhythm Control<br>(N=10,398) | Early Rhythm Control<br>(N=1,227) | Standardized Difference |
| Age                                    | 67.4 (7.7)                            | 64.6 (6.9)                        | 0.381                   | 64.9 (7.9)                            | 64.9 (6.9)                        | <0.001                  |
| CHA <sub>2</sub> DS <sub>2</sub> -VASc | 3.2 (1.2)                             | 2.9 (1.0)                         | 0.223                   | 3.0 (1.0)                             | 3.0 (1.0)                         | <0.001                  |
| Male sex                               | 5743 (55.2)                           | 690 (56.2)                        | 0.02                    | 572 (56.1)                            | 572 (56.1)                        | <0.001                  |
| Hypertension                           | 9625 (92.6)                           | 1145 (93.3)                       | 0.029                   | 949 (93.3)                            | 949 (93.3)                        | <0.001                  |
| Heart failure                          | 5214 (50.1)                           | 724 (59.0)                        | 0.179                   | 588 (57.7)                            | 588 (57.7)                        | <0.001                  |
| CAD                                    | 2657 (25.6)                           | 342 (27.9)                        | 0.052                   | 281 (27.6)                            | 281 (27.6)                        | <0.001                  |
| CKD                                    | 1017 (9.8)                            | 101 (8.2)                         | 0.054                   | 85 (8.3)                              | 85 (8.3)                          | <0.001                  |
| Stroke/TIA                             | 888 (8.5)                             | 73 (5.9)                          | 0.1                     | 63 (6.2)                              | 63 (6.2)                          | <0.001                  |
| Peripheral vascular disease            | 360 (3.5)                             | 41 (3.3)                          | 0.007                   | 33 (3.2)                              | 33 (3.2)                          | <0.001                  |
| Diabetes                               | 1960 (18.8)                           | 182 (14.8)                        | 0.107                   | 156 (15.3)                            | 156 (15.3)                        | <0.001                  |
| Valvular disease                       | 510 (4.9)                             | 83 (6.8)                          | 0.079                   | 63 (6.2)                              | 63 (6.2)                          | <0.001                  |
| Anticoagulation                        | 3443 (33.1)                           | 850 (69.3)                        | 0.776                   | 667 (65.5)                            | 667 (65.5)                        | <0.001                  |
| Dyslipidaemia                          | 2737 (26.3)                           | 301 (24.5)                        | 0.041                   | 249 (24.4)                            | 249 (24.4)                        | <0.001                  |
| Myocardial Infarction                  | 1266 (12.2)                           | 143 (11.7)                        | 0.016                   | 120 (11.8)                            | 120 (11.8)                        | <0.001                  |
| Hypertrophic Cardiomyopathy            | 37 (0.4)                              | 6 (0.5)                           | 0.021                   | 4 (0.4)                               | 4 (0.4)                           | <0.001                  |
| Dilated Cardiomyopathy                 | 81 (0.8)                              | 20 (1.6)                          | 0.078                   | 14 (1.3)                              | 14 (1.3)                          | <0.001                  |
| Hypothyroidism                         | 725 (7.0)                             | 44 (3.6)                          | 0.152                   | 39 (3.9)                              | 39 (3.9)                          | <0.001                  |
| Hyperthyroidism                        | 103 (1.0)                             | 7 (0.6)                           | 0.048                   | 6 (0.6)                               | 6 (0.6)                           | <0.001                  |



|                           |             |            |       |            |            |        |
|---------------------------|-------------|------------|-------|------------|------------|--------|
| COPD                      | 867 (8.3)   | 52 (4.2)   | 0.17  | 47 (4.6)   | 47 (4.6)   | <0.001 |
| Obstructive Sleep Apnea   | 355 (3.4)   | 23 (1.9)   | 0.096 | 20 (2.0)   | 20 (2.0)   | <0.001 |
| Chronic Liver Disease     | 135 (1.3)   | 4 (0.3)    | 0.108 | 4 (0.4)    | 4 (0.4)    | <0.001 |
| Osteoporosis              | 426 (4.1)   | 18 (1.5)   | 0.16  | 16 (1.6)   | 16 (1.6)   | <0.001 |
| Gastrointestinal Ulcer    | 400 (3.8)   | 28 (2.3)   | 0.091 | 25 (2.4)   | 25 (2.4)   | <0.001 |
| Gastrointestinal Bleeding | 401 (3.9)   | 27 (2.2)   | 0.097 | 24 (2.3)   | 24 (2.3)   | <0.001 |
| Alcohol Abuse             | 338 (3.3)   | 21 (1.7)   | 0.099 | 18 (1.7)   | 18 (1.7)   | <0.001 |
| Pulmonary Embolism        | 283 (2.7)   | 17 (1.4)   | 0.094 | 15 (1.5)   | 15 (1.5)   | <0.001 |
| History Of Endocarditis   | 89 (0.9)    | 12 (1.0)   | 0.013 | 10 (0.9)   | 10 (0.9)   | <0.001 |
| Cancer                    | 1954 (18.8) | 154 (12.6) | 0.172 | 135 (13.2) | 135 (13.2) | <0.001 |
| Is Current Smoker         | 1007 (9.7)  | 98 (8.0)   | 0.06  | 84 (8.3)   | 84 (8.3)   | <0.001 |

Values are presented as mean (SD) or as absolute numbers (%). CAD indicates coronary artery disease; CKD, chronic kidney disease; COPD, chronic obstructive pulmonary disease; PS, propensity score.

**Supplemental Table III. Primary Composite Outcome (Crude Numbers)**

|                                | No Early Rhythm Control |              |                                 | Early Rhythm Control |              |                                 |
|--------------------------------|-------------------------|--------------|---------------------------------|----------------------|--------------|---------------------------------|
|                                | No. of Events           | Person Years | Event Rate per 100 person-years | No. of Events        | Person Years | Event Rate per 100 person-years |
| <b>OptumLabs</b>               | N=77,460                |              |                                 | N=24,382             |              |                                 |
| <b>Composite</b>               |                         |              |                                 |                      |              |                                 |
| 2-3                            | 1,738                   | 45,931       | 3.78                            | 504                  | 17,994       | 2.80                            |
| ≥4                             | 19,183                  | 137,664      | 13.93                           | 4746                 | 41,036       | 11.57                           |
| <b>Stroke</b>                  |                         |              |                                 |                      |              |                                 |
| 2-3                            | 333                     | 47,065       | 0.71                            | 87                   | 18,375       | 0.47                            |
| ≥4                             | 2,785                   | 147,754      | 1.88                            | 600                  | 43,975       | 1.36                            |
| <b>Heart failure</b>           |                         |              |                                 |                      |              |                                 |
| 2-3                            | 416                     | 46,904       | 0.89                            | 145                  | 18,274       | 0.79                            |
| ≥4                             | 6,113                   | 143,649      | 4.26                            | 1816                 | 42,445       | 4.28                            |
| <b>Acute Coronary Syndrome</b> |                         |              |                                 |                      |              |                                 |
| 2-3                            | 309                     | 46,975       | 0.66                            | 98                   | 18,347       | 0.53                            |
| ≥4                             | 2,465                   | 147,914      | 1.67                            | 554                  | 44,012       | 1.26                            |
| <b>Mortality</b>               |                         |              |                                 |                      |              |                                 |
| 2-3                            | 918                     | 47,514       | 1.93                            | 238                  | 18,503       | 1.29                            |
| ≥4                             | 12,754                  | 151,169      | 8.44                            | 2971                 | 44,778       | 6.63                            |
| <b>UK Biobank</b>              | N=10,495                |              |                                 | N=1,237              |              |                                 |
| <b>Composite</b>               |                         |              |                                 |                      |              |                                 |
| 2-3                            | 2,020                   | 36,888       | 5.48                            | 301                  | 6,366        | 4.73                            |
| ≥4                             | 1,079                   | 8,342        | 12.94                           | 117                  | 1,404        | 8.34                            |
| <b>Stroke</b>                  |                         |              |                                 |                      |              |                                 |
| 2-3                            | 391                     | 40,628       | 0.96                            | 57                   | 7,113        | 0.80                            |
| ≥4                             | 162                     | 9,506        | 1.70                            | 25                   | 1,532        | 1.63                            |
| <b>Heart failure</b>           |                         |              |                                 |                      |              |                                 |
| 2-3                            | 1,072                   | 38,480       | 2.79                            | 191                  | 6,587        | 2.90                            |
| ≥4                             | 659                     | 8,714        | 7.56                            | 61                   | 1,477        | 4.13                            |

|                                |       |        |      |     |       |      |
|--------------------------------|-------|--------|------|-----|-------|------|
| <b>Acute Coronary Syndrome</b> |       |        |      |     |       |      |
| 2-3                            | 250   | 41,042 | 0.61 | 40  | 7,144 | 0.56 |
| ≥4                             | 151   | 9,602  | 1.57 | 10  | 1,572 | 0.64 |
| <b>Mortality</b>               |       |        |      |     |       |      |
| 2-3                            | 1,042 | 41,912 | 2.49 | 147 | 7,289 | 2.02 |
| ≥4                             | 538   | 9,867  | 5.45 | 64  | 1,602 | 3.99 |

Primary composite outcome in the unweighted cohorts.

**Supplemental Table IV. Safety Outcomes (Crude Numbers)**

|                                        | No Early Rhythm Control |              |                                 | Early Rhythm Control |              |                                 |
|----------------------------------------|-------------------------|--------------|---------------------------------|----------------------|--------------|---------------------------------|
|                                        | No. of Events           | Person Years | Event Rate per 100 person-years | No. of Events        | Person Years | Event Rate per 100 person-years |
| <b>OptumLabs</b>                       | N=77,460                |              |                                 | N=24,382             |              |                                 |
| <b>Composite</b>                       |                         |              |                                 |                      |              |                                 |
| 2-3                                    | 2,296                   | 44,861       | 5.12                            | 729                  | 17,571       | 4.15                            |
| ≥4                                     | 20,767                  | 133,739      | 15.53                           | 5,302                | 39,600       | 13.39                           |
| <b>Onset stroke</b>                    |                         |              |                                 |                      |              |                                 |
| 2-3                                    | 387                     | 46,973       | 0.82                            | 99                   | 18,355       | 0.54                            |
| ≥4                                     | 3,191                   | 147,176      | 2.17                            | 179                  | 43,795       | 0.41                            |
| <b>Mortality</b>                       |                         |              |                                 |                      |              |                                 |
| 2-3                                    | 918                     | 47,514       | 1.93                            | 238                  | 18,503       | 1.29                            |
| ≥4                                     | 12,754                  | 151,169      | 8.44                            | 2,971                | 44,778       | 6.63                            |
| <b>Arrest</b>                          |                         |              |                                 |                      |              |                                 |
| 2-3                                    | 98                      | 47,500       | 0.21                            | 25                   | 18,500       | 0.14                            |
| ≥4                                     | 853                     | 151,104      | 0.56                            | 226                  | 44,756       | 0.50                            |
| <b>Bradycardia</b>                     |                         |              |                                 |                      |              |                                 |
| 2-3                                    | 62                      | 47,416       | 0.13                            | 43                   | 18,437       | 0.23                            |
| ≥4                                     | 543                     | 150,368      | 0.36                            | 169                  | 44,520       | 0.38                            |
| <b>Atrioventricular block</b>          |                         |              |                                 |                      |              |                                 |
| 2-3                                    | 34                      | 47,456       | 0.07                            | 15                   | 18,479       | 0.08                            |
| ≥4                                     | 327                     | 150,635      | 0.22                            | 105                  | 44,620       | 0.24                            |
| <b>Torsades de pointes tachycardia</b> |                         |              |                                 |                      |              |                                 |
| 2-3                                    | *                       | *            | *                               | *                    | *            | *                               |
| ≥4                                     | *                       | *            | *                               | *                    | *            | *                               |

|                                    |       |                 |      |       |                |      |  |
|------------------------------------|-------|-----------------|------|-------|----------------|------|--|
| <b>Pericardial tamponade</b>       |       |                 |      |       |                |      |  |
| 2-3                                | *     | *               | *    | *     | *              | *    |  |
| ≥4                                 | *     | *               | *    | *     | *              | *    |  |
| <b>Major bleed</b>                 |       |                 |      |       |                |      |  |
| 2-3                                | 657   | 46,501          | 1.41 | 231   | 18,138         | 1.27 |  |
| ≥4                                 | 5,082 | 143,863         | 3.53 | 1,437 | 42,568         | 3.38 |  |
| <b>Blood pressure-related</b>      |       |                 |      |       |                |      |  |
| 2-3                                | 16    | 47,485          | 0.03 | *     | *              | *    |  |
| ≥4                                 | 116   | 150,999         | 0.08 | 32    | 44,726         | 0.07 |  |
| <b>Syncope</b>                     |       |                 |      |       |                |      |  |
| 2-3                                | 519   | 46,536          | 1.12 | 178   | 18,169         | 0.98 |  |
| ≥4                                 | 3,529 | 145,088         | 2.43 | 963   | 43,108         | 2.23 |  |
| <b>Cardiac device implantation</b> |       |                 |      |       |                |      |  |
| 2-3                                | 171   | 47,196          | 0.36 | 71    | 18,378         | 0.39 |  |
| ≥4                                 | 1,210 | 149,161         | 0.81 | 515   | 43,899         | 1.17 |  |
| <b>UKB</b>                         |       | <b>N=10,495</b> |      |       | <b>N=1,237</b> |      |  |
| <b>Composite</b>                   |       |                 |      |       |                |      |  |
| 2-3                                | 1,524 | 39,113          | 3.90 | 237   | 6,760          | 3.51 |  |
| ≥4                                 | 724   | 9,159           | 7.91 | 93    | 1,473          | 6.31 |  |
| <b>Onset stroke</b>                |       |                 |      |       |                |      |  |
| 2-3                                | 327   | 40,602          | 0.81 | 47    | 7,062          | 0.67 |  |
| ≥4                                 | 135   | 9,435           | 1.43 | 21    | 1,535          | 1.37 |  |
| <b>Mortality</b>                   |       |                 |      |       |                |      |  |
| 2-3                                | 1,029 | 41,581          | 2.47 | 145   | 7,206          | 2.01 |  |
| ≥4                                 | 530   | 9,718           | 5.45 | 64    | 1,600          | 4.00 |  |
| <b>Cardiac arrest</b>              |       |                 |      |       |                |      |  |
| 2-3                                | 15    | 41,558          | 0.04 | 7     | 7,192          | 0.10 |  |

|                                        |     |        |      |    |       |      |
|----------------------------------------|-----|--------|------|----|-------|------|
| ≥4                                     | 9   | 9,707  | 0.09 | 4  | 1,596 | 0.25 |
| <b>Bradycardia</b>                     |     |        |      |    |       |      |
| 2-3                                    | 50  | 41,359 | 0.12 | 9  | 7,179 | 0.13 |
| ≥4                                     | 14  | 9,691  | 0.14 | 5  | 1,584 | 0.32 |
| <b>Atrioventricular block</b>          |     |        |      |    |       |      |
| 2-3                                    | 60  | 41,375 | 0.15 | 12 | 7,162 | 0.17 |
| ≥4                                     | 26  | 9,682  | 0.27 | 5  | 1,587 | 0.31 |
| <b>Torsades de pointes tachycardia</b> |     |        |      |    |       |      |
| 2-3                                    | 0   | 41,581 | 0.00 | 0  | 7,206 | 0.00 |
| ≥4                                     | 0   | 9,718  | 0.00 | 0  | 1,600 | 0.00 |
| <b>Pericardial tamponade</b>           |     |        |      |    |       |      |
| 2-3                                    | 0   | 41,581 | 0.00 | 0  | 7,206 | 0.00 |
| ≥4                                     | 0   | 9,718  | 0.00 | 0  | 1,600 | 0.00 |
| <b>Major bleed</b>                     |     |        |      |    |       |      |
| 2-3                                    | 77  | 41,291 | 0.19 | 14 | 7,131 | 0.20 |
| ≥4                                     | 21  | 9,687  | 0.22 | 2  | 1,592 | 0.13 |
| <b>Blood pressure-related</b>          |     |        |      |    |       |      |
| 2-3                                    | 4   | 41,556 | 0.01 | 1  | 7,200 | 0.01 |
| ≥4                                     | 2   | 9,718  | 0.02 | 1  | 1,596 | 0.06 |
| <b>Syncope</b>                         |     |        |      |    |       |      |
| 2-3                                    | 250 | 40,623 | 0.62 | 47 | 7,048 | 0.67 |
| ≥4                                     | 108 | 9,509  | 1.14 | 12 | 1,571 | 0.76 |
| <b>Cardiac device implantation</b>     |     |        |      |    |       |      |
| 2-3                                    | 431 | 39,817 | 1.08 | 83 | 6,797 | 1.22 |
| ≥4                                     | 157 | 9,407  | 1.67 | 26 | 1,534 | 1.69 |

Primary safety outcome and adverse events of special interest in the unweighted cohorts. \* To maintain de-identification, OptumLabs does not allow researchers to disclose the number of events when the number is 10 or fewer.

**Supplemental Table V. Sensitivity Analysis Replicating EAST-AFNET 4**

|                                | No Early Rhythm Control |              |                                 | Early Rhythm Control |              |                                 | Absolute Rate Difference (95% CI) | Hazard Ratio (95% CI) | P-value | P-value for interaction |
|--------------------------------|-------------------------|--------------|---------------------------------|----------------------|--------------|---------------------------------|-----------------------------------|-----------------------|---------|-------------------------|
|                                | No. of Events           | Person Years | Event Rate per 100 person-years | No. of Events        | Person Years | Event Rate per 100 person-years |                                   |                       |         |                         |
| <b>OptumLabs</b>               | N=61,157                |              |                                 | N=17,986             |              |                                 |                                   |                       |         |                         |
| <b>Composite</b>               |                         |              |                                 |                      |              |                                 |                                   |                       |         | 0.929                   |
| <4                             | 9                       | 357          | 2.66                            | 8                    | 335          | 2.41                            | -0.24 (-1.79, 1.29)               | 0.92 (0.51, 1.66)     | 0.779   |                         |
| ≥4                             | 155                     | 1,139        | 13.63                           | 134                  | 1,118        | 12.02                           | -1.61 (-3.72, 0.50)               | 0.88 (0.75, 1.03)     | 0.123   |                         |
| <b>Stroke</b>                  |                         |              |                                 |                      |              |                                 |                                   |                       |         | 0.502                   |
| <4                             | 1                       | 362          | 0.41                            | 2                    | 341          | 0.45                            | 0.04 (-0.58, 0.66)                | 1.10 (0.25, 4.87)     | 0.904   |                         |
| ≥4                             | 29                      | 1,227        | 2.34                            | 18                   | 1,205        | 1.52                            | -0.83 (-1.67, 0.02)               | 0.66 (0.44, 0.99)     | 0.047   |                         |
| <b>Heart failure</b>           |                         |              |                                 |                      |              |                                 |                                   |                       |         | 0.567                   |
| <4                             | 2                       | 362          | 0.68                            | 2                    | 341          | 0.49                            | -0.18 (-0.90, 0.54)               | 0.73 (0.24, 2.24)     | 0.586   |                         |
| ≥4                             | 54                      | 1,192        | 4.52                            | 54                   | 1,159        | 4.64                            | 0.12 (-1.13, 1.37)                | 1.03 (0.79, 1.36)     | 0.810   |                         |
| <b>Acute coronary syndrome</b> |                         |              |                                 |                      |              |                                 |                                   |                       |         | 0.005                   |
| <4                             | 1                       | 363          | 0.25                            | 3                    | 339          | 0.81                            | 0.56 (-0.05, 1.17)                | 3.20 (1.15, 8.93)     | 0.027   |                         |
| ≥4                             | 25                      | 1,239        | 1.99                            | 16                   | 1,207        | 1.33                            | -0.66 (-1.42, 0.09)               | 0.67 (0.44, 1.01)     | 0.058   |                         |
| <b>All-cause mortality</b>     |                         |              |                                 |                      |              |                                 |                                   |                       |         | 0.382                   |
| <4                             | 6                       | 365          | 1.60                            | 3                    | 344          | 0.96                            | -0.64 (-1.81, 0.52)               | 0.62 (0.27, 1.42)     | 0.254   |                         |
| ≥4                             | 97                      | 1,268        | 7.63                            | 82                   | 1,230        | 6.70                            | -0.93 (-2.41, 0.55)               | 0.88 (0.72, 1.08)     | 0.220   |                         |

| UK Biobank                     |     | N=8,736 |       |     | N=868 |      |                      |                   |       |       |
|--------------------------------|-----|---------|-------|-----|-------|------|----------------------|-------------------|-------|-------|
| <b>Composite</b>               |     |         |       |     |       |      |                      |                   |       | 0.036 |
| <4                             | 152 | 2,248   | 6.75  | 143 | 2,387 | 5.97 | -0.78 (-0.79, -0.73) | 0.88 (0.75, 1.04) | 0.139 |       |
| ≥4                             | 80  | 707     | 11.38 | 86  | 896   | 9.56 | -1.82 (-1.92, -1.79) | 0.84 (0.68, 1.04) | 0.112 |       |
| <b>Stroke</b>                  |     |         |       |     |       |      |                      |                   |       | 0.810 |
| <4                             | 25  | 2,509   | 1.00  | 24  | 2,608 | 0.91 | -0.09 (-0.10, -0.08) | 0.93 (0.62, 1.39) | 0.715 |       |
| ≥4                             | 12  | 819     | 1.47  | 17  | 969   | 1.79 | 0.32 (0.28, 0.33)    | 1.25 (0.77, 2.02) | 0.370 |       |
| <b>Heart failure</b>           |     |         |       |     |       |      |                      |                   |       | 0.047 |
| <4                             | 89  | 2,327   | 3.80  | 88  | 2,458 | 3.60 | -0.21 (-0.22, -0.17) | 0.95 (0.77, 1.17) | 0.636 |       |
| ≥4                             | 50  | 739     | 6.82  | 42  | 930   | 4.47 | -2.35 (-2.4, -2.31)  | 0.66 (0.49, 0.89) | 0.006 |       |
| <b>Acute Coronary Syndrome</b> |     |         |       |     |       |      |                      |                   |       | 0.102 |
| <4                             | 18  | 2,518   | 0.73  | 18  | 2,620 | 0.71 | -0.03 (-0.05, -0.03) | 1.00 (0.63, 1.57) | 0.987 |       |
| ≥4                             | 13  | 813     | 1.57  | 5   | 999   | 0.53 | -1.04 (-1.06, -1.03) | 0.35 (0.15, 0.82) | 0.015 |       |
| <b>Mortality</b>               |     |         |       |     |       |      |                      |                   |       | 0.672 |
| <4                             | 68  | 2,566   | 2.65  | 68  | 2,664 | 2.55 | -0.11 (-0.10, -0.07) | 0.98 (0.77, 1.24) | 0.864 |       |
| ≥4                             | 37  | 841     | 4.45  | 49  | 1,004 | 4.88 | 0.44 (0.36, 0.45)    | 1.13 (0.85, 1.51) | 0.399 |       |

Event rate was calculated as the number of events per 100 person-years. Propensity score weight was applied when calculating number of events, person-years, event rates, absolute reduction, and hazard ratios. CI indicates confidence interval.



**Supplemental Table VI. Falsification Analysis**

|                                 | No Early Rhythm Control         | Early Rhythm Control            | P-value for interaction |
|---------------------------------|---------------------------------|---------------------------------|-------------------------|
|                                 | Event Rate per 100 person-years | Event Rate per 100 person-years |                         |
| <b>OptumLabs</b>                | <b>N=77,460</b>                 | <b>N=24,382</b>                 |                         |
| <b>Asthma</b>                   |                                 |                                 | 0.158                   |
| 2-3                             | 0.14                            | 0.06                            |                         |
| ≥4                              | 0.20                            | 0.28                            |                         |
| <b>Epilepsy</b>                 |                                 |                                 | 0.005                   |
| 2-3                             | 0.23                            | 0.02                            |                         |
| ≥4                              | 0.18                            | 0.18                            |                         |
| <b>Lung cancer</b>              |                                 |                                 | 0.230                   |
| 2-3                             | 0.29                            | 0.07                            |                         |
| ≥4                              | 0.32                            | 0.25                            |                         |
| <b>Major fracture</b>           |                                 |                                 | 0.782                   |
| 2-3                             | 1.37                            | 1.79                            |                         |
| ≥4                              | 3.78                            | 4.39                            |                         |
| <b>Type 2 diabetes mellitus</b> |                                 |                                 | 0.004                   |
| 2-3                             | 0.58                            | 0.12                            |                         |
| ≥4                              | 1.49                            | 1.81                            |                         |
| <b>UKB</b>                      | <b>N=10,398</b>                 | <b>N=1,227</b>                  |                         |
| <b>Asthma</b>                   |                                 |                                 | 0.075                   |
| 2-3                             | 1.31                            | 1.22                            |                         |
| ≥4                              | 2.43                            | 1.43                            |                         |
| <b>Epilepsy</b>                 |                                 |                                 | 0.015                   |
| 2-3                             | 0.26                            | 0.17                            |                         |

|                                 |      |      |       |
|---------------------------------|------|------|-------|
| ≥4                              | 0.62 | 0.18 |       |
| <b>Lung cancer</b>              |      |      | 0.120 |
| 2-3                             | 0.18 | 0.22 |       |
| ≥4                              | 0.28 | 0.60 |       |
| <b>Major fracture</b>           |      |      | 0.295 |
| 2-3                             | 0.33 | 0.33 |       |
| ≥4                              | 0.90 | 1.26 |       |
| <b>Type 2 diabetes mellitus</b> |      |      | 0.232 |
| 2-3                             | 1.98 | 1.86 |       |
| ≥4                              | 7.83 | 6.89 |       |
